# Supplementary material for: Life course socioeconomic position and DNA methylation age acceleration in mid-life
Source: PubMed Central journal article supplement (PMC8515099; doi:10.1136/jech-2020-215608), 2021-04-27
Supplement: jech-2020-215608supp001.pdf [file jech-2020-215608supp001.pdf]

**Table S1**

Pairwise correlation between the four DNAm age acceleration markers (n=1376)

|                    | <b>Horvath AA</b> | <b>Hannum AA</b> | <b>PhenoAge AA</b> | <b>GrimAge AA</b> |
|--------------------|-------------------|------------------|--------------------|-------------------|
| <b>Horvath AA</b>  | 1.00              |                  |                    |                   |
| <b>Hannum AA</b>   | 0.40              | 1.00             |                    |                   |
| <b>PhenoAge AA</b> | 0.42              | 0.49             | 1.00               |                   |
| <b>GrimAge AA</b>  | 0.13              | 0.25             | 0.41               | 1.00              |

AA Age acceleration

**Table S2**

Adjusted regression models of the association of childhood social class (age 4) and adult social class (age 53), respectively, with four DNA methylation age acceleration markers measured at age 53 in men and women (n=1273)

|                               | <b>Horvath AA<sup>a</sup></b> | <b>Hannum AA<sup>a</sup></b> | <b>PhenoAge AA<sup>a</sup></b> | <b>GrimAge AA<sup>a</sup></b> | <b>Hannum AA<sup>b</sup></b>  | <b>Hannum AA<sup>b</sup></b> | <b>PhenoAge AA<sup>b</sup></b> | <b>GrimAge AA<sup>b</sup></b> |
|-------------------------------|-------------------------------|------------------------------|--------------------------------|-------------------------------|-------------------------------|------------------------------|--------------------------------|-------------------------------|
| <b>Childhood Social class</b> | Coeff. (95% CI)               | Coeff. (95% CI)              | Coeff. (95% CI)                | Coeff. (95% CI)               | Coeff. (95% CI)               | Coeff. (95% CI)              | Coeff. (95% CI)                | Coeff. (95% CI)               |
| Non-manual                    | Reference                     | Reference                    | Reference                      | Reference                     | Reference                     | Reference                    | Reference                      | Reference                     |
| Manual                        | -0.03<br>(-0.48, 0.42)        | 0.74<br>(0.28, 1.20)         | 1.08<br>(0.46, 1.70)           | 1.53<br>(0.99, 2.07)          | -0.13<br>(-0.57, 0.32)        | 0.38<br>(-0.02, 0.78)        | 0.48<br>(-0.05, 1.01)          | 1.10<br>(0.59, 1.61)          |
| LRT p-value <sup>c</sup>      | 0.05                          | 0.43                         | 0.28                           | 0.17                          |                               |                              |                                |                               |
|                               | <b>Horvath AA<sup>a</sup></b> | <b>Hannum AA<sup>a</sup></b> | <b>PhenoAge AA<sup>a</sup></b> | <b>GrimAge AA<sup>a</sup></b> | <b>Horvath AA<sup>b</sup></b> | <b>Hannum AA<sup>b</sup></b> | <b>PhenoAge AA<sup>b</sup></b> | <b>GrimAge AA<sup>b</sup></b> |
| <b>Adult social class</b>     | Coeff. (95% CI)               | Coeff. (95% CI)              | Coeff. (95% CI)                | Coeff. (95% CI)               | Coeff. (95% CI)               | Coeff. (95% CI)              | Coeff. (95% CI)                | Coeff. (95% CI)               |
| Non-manual                    | Reference                     | Reference                    | Reference                      | Reference                     | Reference                     | Reference                    | Reference                      | Reference                     |
| Manual                        | 0.30<br>(-0.17, 0.77)         | 0.11<br>(-0.38, 0.60)        | 0.70<br>(0.05, 1.36)           | 1.80<br>(1.23, 2.37)          | 0.30<br>(-0.17, 0.76)         | -0.04<br>(-0.46, 0.39)       | 0.40<br>(-0.15, 0.96)          | 1.51<br>(0.98, 2.04)          |
| LRT p-value <sup>d</sup>      | 0.96                          | 0.56                         | 0.56                           | 0.46                          |                               |                              |                                |                               |

AA age acceleration, LRT log-likelihood ratio test

<sup>a</sup> Adjusted for sex

<sup>b</sup> Adjusted for sex, naïve and exhausted CD8+T-lymphocytes, CD4+ T-lymphocytes, B cells, natural killer cells, monocytes and granulocytes

<sup>c</sup> P-value log-likelihood ratio test for interaction between binary childhood social class (age 4) and sex

<sup>d</sup> P-value log-likelihood ratio test for interaction between binary adult class (age 53) and sex

**Table S3**

Adjusted regression models of the association of childhood social class (age 4) with four DNA methylation age acceleration markers measured at age 53 in men and women (n=1261)

|                              | Horvath AA <sup>a</sup> | Horvath AA <sup>b</sup> | Hannum AA <sup>a</sup> | Hannum AA <sup>b</sup> | PhenoAge AA <sup>a</sup> | PhenoAge AA <sup>b</sup> | GrimAge AA <sup>a</sup> | GrimAge AA <sup>b</sup> |
|------------------------------|-------------------------|-------------------------|------------------------|------------------------|--------------------------|--------------------------|-------------------------|-------------------------|
| <b>Father's Social Class</b> | Coeff. (95% CI)         | Coeff. (95% CI)         | Coeff. (95% CI)        | Coeff. (95% CI)        | Coeff. (95% CI)          | Coeff. (95% CI)          | Coeff. (95% CI)         | Coeff. (95% CI)         |
| Professional                 | Reference               | Reference               | Reference              | Reference              | Reference                | Reference                | Reference               | Reference               |
| Intermediate                 | 0.97 (-0.10, 2.03)      | 1.05 (-0.02, 2.12)      | 0.57 (-0.52, 1.67)     | 0.62 (-0.48, 1.72)     | 1.59 (0.12, 3.05)        | 1.57 (0.09, 3.05)        | 1.07 (-0.20, 2.35)      | 0.69 (-0.57, 1.96)      |
| Skilled non-manual           | 0.43 (-0.62, 1.49)      | 0.54 (-0.52, 1.61)      | 0.82 (-0.27, 1.91)     | 0.87 (-0.22, 1.97)     | 1.68 (0.22, 3.14)        | 1.68 (0.20, 3.15)        | 0.68 (-0.59, 1.94)      | 0.26 (-1.00, 1.53)      |
| Skilled manual               | 0.45 (-0.57, 1.47)      | 0.62 (-0.43, 1.68)      | 1.20 (0.15, 2.25)      | 1.37 (0.28, 2.45)      | 2.41 (1.00, 3.81)        | 2.43 (0.98, 3.89)        | 2.00 (0.78, 3.23)       | 1.09 (-0.15, 2.34)      |
| Partly Skilled               | 0.25 (-0.83, 1.32)      | 0.42 (-0.69, 1.53)      | 1.27 (0.17, 2.37)      | 1.47 (0.33, 2.60)      | 1.96 (0.48, 3.44)        | 2.00 (0.48, 3.53)        | 1.38 (0.09, 2.66)       | 0.41 (-0.89, 1.72)      |
| Unskilled                    | 0.65 (-0.71, 2.00)      | 0.82 (-0.57, 2.20)      | 1.84 (0.44, 3.23)      | 2.09 (0.66, 3.51)      | 3.02 (1.15, 4.89)        | 3.09 (1.18, 5.01)        | 2.07 (0.45, 3.69)       | 0.97 (-0.67, 2.61)      |
| P-value for trend            | 0.56                    | 0.83                    | 0.00                   | <0.001                 | 0.00                     | 0.00                     | <0.001 <sup>c</sup>     | 0.44                    |

AA age acceleration

<sup>a</sup> Adjusted for sex and adult social class

<sup>b</sup> Adjusted for sex, adult social class and education

<sup>c</sup> Test for heterogeneity across groups if evidence of deviation from linearity

**Table S4**

Adjusted regression models of the association between childhood social class (age 4) with four DNA methylation age acceleration markers measured at age 53 in men and women (n=1273)

|                               | <b>Horvath AA<sup>a</sup></b> | <b>Hannum AA<sup>a</sup></b> | <b>PhenoAge AA<sup>a</sup></b> | <b>GrimAge AA<sup>a</sup></b> |
|-------------------------------|-------------------------------|------------------------------|--------------------------------|-------------------------------|
| <b>Childhood social class</b> | Coeff. (95% CI)               | Coeff. (95% CI)              | Coeff. (95% CI)                | Coeff. (95% CI)               |
| Professional                  | Reference                     | Reference                    | Reference                      | Reference                     |
| Intermediate                  | 0.93 (-0.12, 1.98)            | 0.42 (-0.53, 1.38)           | 1.17 (-0.09, 2.42)             | 1.00 (-0.20, 2.21)            |
| Skilled non-manual            | 0.24 (-0.80, 1.28)            | 0.30 (-0.64, 1.25)           | 0.75 (-0.50, 2.00)             | 0.27 (-0.92, 1.47)            |
| Skilled manual                | 0.41 (-0.59, 1.41)            | 0.63 (-0.28, 1.53)           | 1.42 (0.22, 2.61)              | 1.76 (0.62, 2.91)             |
| Partly Skilled                | 0.25 (-0.78, 1.29)            | 0.76 (-0.18, 1.70)           | 1.08 (-0.16, 2.32)             | 1.42 (0.23, 2.60)             |
| Unskilled                     | 0.55 (-0.78, 1.87)            | 0.83 (-0.37, 2.03)           | 1.54 (-0.05, 3.12)             | 1.78 (0.26, 3.30)             |
| P-value for trend             | 0.53                          | 0.07                         | 0.10                           | <0.001 <sup>b</sup>           |

AA age acceleration

<sup>a</sup> Adjusted for sex, naïve and exhausted CD8+T-lymphocytes, CD4+ T-lymphocytes, B cells, natural killer cells, monocytes and granulocytes

<sup>b</sup> Test for heterogeneity across groups if evidence of deviation from linearity

**Table S5**

Adjusted regression models of the association between own adult social class (age 53) with four DNA methylation age acceleration markers measured at age 53 in men and women (n=1273)

|                           | <b>Horvath AA<sup>a</sup></b> | <b>Hannum AA<sup>a</sup></b> | <b>PhenoAge AA<sup>a</sup></b> | <b>GrimAge AA<sup>a</sup></b> |
|---------------------------|-------------------------------|------------------------------|--------------------------------|-------------------------------|
| <b>Adult social class</b> | Coeff. (95% CI)               | Coeff. (95% CI)              | Coeff. (95% CI)                | Coeff. (95% CI)               |
| Professional              | Reference                     | Reference                    | Reference                      | Reference                     |
| Intermediate              | -0.36 (-1.29, 0.58)           | -0.03 (-0.88, 0.81)          | -0.37 (-1.49, 0.76)            | 0.58 (-0.48, 1.65)            |
| Skilled non-manual        | -0.10 (-1.11, 0.91)           | 0.42 (-0.49, 1.33)           | 0.22 (-0.98, 1.43)             | 1.13 (-0.02, 2.28)            |
| Skilled manual            | 0.71 (-0.30, 1.72)            | 0.66 (-0.25, 1.58)           | 0.08 (-1.13, 1.29)             | 2.30 (1.15, 3.46)             |
| Partly Skilled            | -0.39 (-1.47, 0.69)           | -0.40 (-1.37, 0.58)          | 0.51 (-0.79, 1.81)             | 1.82 (0.59, 3.06)             |
| Unskilled                 | -0.93 (-2.31, 0.44)           | -0.58 (-1.82, 0.67)          | 0.29 (-1.36, 1.95)             | 3.00 (1.43, 4.57)             |
| P-value for trend         | 0.02 <sup>b</sup>             | 0.02 <sup>b</sup>            | 0.08                           | <0.001                        |

AA age acceleration

<sup>a</sup> Adjusted for sex, naïve and exhausted CD8+T-lymphocytes, CD4+ T-lymphocytes, B cells, natural killer cells, monocytes and granulocytes

<sup>b</sup> Test for heterogeneity across groups if evidence of deviation from linearity

**Table S6**

Adjusted regression models of the association of intergenerational social class change (between age 4 and age 53) with four DNA methylation age acceleration markers measured at age 53 in men and women (n=1273)

|                                              | <b>Horvath AA<sup>a</sup></b> | <b>Hannum AA<sup>a</sup></b> | <b>PhenoAge AA<sup>a</sup></b> | <b>GrimAge AA<sup>a</sup></b> |
|----------------------------------------------|-------------------------------|------------------------------|--------------------------------|-------------------------------|
| <b>Intergenerational social class change</b> | Coeff. (95% CI)               | Coeff. (95% CI)              | Coeff. (95% CI)                | Coeff. (95% CI)               |
| Stable non-manual                            | Reference                     | Reference                    | Reference                      | Reference                     |
| Non-manual to manual                         | 0.69 (-0.17, 1.55)            | 0.42 (-0.36, 1.20)           | 0.47 (-0.57, 1.50)             | 1.63 (0.65, 2.61)             |
| Manual to non-manual                         | -0.08 (-0.62, 0.45)           | 0.64 (0.15, 1.12)            | 0.48 (-0.16, 1.12)             | 0.91 (0.30, 1.52)             |
| Stable manual                                | 0.11 (-0.46, 0.69)            | 0.22 (-0.30, 0.74)           | 0.69 (-0.00, 1.38)             | 2.06 (1.40, 2.71)             |

AA age acceleration

<sup>a</sup>Adjusted for sex, naïve and exhausted CD8+T-lymphocytes, CD4+ T-lymphocytes, B cells, natural killer cells, monocytes and granulocytes

**Table S7**

Adjusted regression models of the association of highest educational attainment (age 26) with four DNA methylation age acceleration markers measured at age 53 in men and women (n=1361)

|                               | <b>Horvath AA<sup>a</sup></b> | <b>Hannum AA<sup>a</sup></b> | <b>PhenoAge AA<sup>a</sup></b> | <b>GrimAge AA<sup>a</sup></b> |
|-------------------------------|-------------------------------|------------------------------|--------------------------------|-------------------------------|
| <b>Educational attainment</b> | Coeff. (95% CI)               | Coeff. (95% CI)              | Coeff. (95% CI)                | Coeff. (95% CI)               |
| Higher education              | Reference                     | Reference                    | Reference                      | Reference                     |
| School post 16                | -0.44 (-1.24, 0.35)           | 0.11 (-0.60, 0.83)           | 0.08 (-0.89, 1.04)             | 1.24 (0.34, 2.14)             |
| Vocational/school to 16       | -0.49 (-1.28, 0.31)           | 0.37 (-0.35, 1.08)           | 0.57 (-0.39, 1.53)             | 2.03 (1.13, 2.93)             |
| No quals                      | -0.41 (-1.19, 0.36)           | -0.20 (-0.90, 0.50)          | 0.26 (-0.67, 1.20)             | 3.40 (2.53, 4.28)             |
| P-value for trend             | 0.52                          | 0.31                         | 0.46                           | <0.001                        |

AA Age acceleration

<sup>a</sup> Adjusted for sex, naïve and exhausted CD8+T-lymphocytes, CD4+ T-lymphocytes, B cells, natural killer cells, monocytes and granulocytes

**Table S8**

Adjusted regression models of the association of annual household income (age 53) with four DNA methylation age markers measured at age 53 in men and women (n=1315)

|                         | <b>Horvath AA<sup>a</sup></b> | <b>Hannum AA<sup>a</sup></b> | <b>PhenoAge AA<sup>a</sup></b> | <b>GrimAge AA<sup>a</sup></b> |
|-------------------------|-------------------------------|------------------------------|--------------------------------|-------------------------------|
| <b>Household income</b> | Coeff. (95% CI)               | Coeff. (95% CI)              | Coeff. (95% CI)                | Coeff. (95% CI)               |
| £45 000 or more         | Reference                     | Reference                    | Reference                      | Reference                     |
| £35 000 - £44 999       | 0.61 (-0.39, 1.62)            | 0.34 (-0.57, 1.25)           | 0.06 (-1.16, 1.27)             | 0.71 (-0.43, 1.86)            |
| £30 000 - £34 999       | 0.13 (-0.78, 1.04)            | 0.23 (-0.59, 1.04)           | 0.01 (-1.09, 1.10)             | 0.26 (-0.77, 1.29)            |
| £25 000 - £29 999       | 0.58 (-0.42, 1.59)            | 0.19 (-0.71, 1.10)           | -0.22 (-1.43, 0.99)            | 0.02 (-1.13, 1.16)            |
| £20 000 - £24 999       | 0.53 (-0.36, 1.42)            | 0.23 (-0.57, 1.03)           | 0.18 (-0.89, 1.25)             | 0.59 (-0.41, 1.60)            |
| £15 000 - £19 999       | 0.22 (-0.68, 1.12)            | 0.26 (-0.55, 1.07)           | 0.57 (-0.51, 1.66)             | 1.86 (0.84, 2.88)             |
| £10 000 - £14 999       | 0.12 (-0.78, 1.02)            | 0.08 (-0.73, 0.89)           | 0.25 (-0.83, 1.33)             | 1.66 (0.64, 2.68)             |
| Less than £10 000       | 0.48 (-0.45, 1.42)            | 0.56 (-0.28, 1.40)           | 0.83 (-0.30, 1.96)             | 2.90 (1.84, 3.96)             |
| P-value for trend       | 0.84                          | 0.52                         | 0.09                           | <0.001 <sup>b</sup>           |

AA age acceleration

<sup>a</sup> Adjusted for sex, naïve and exhausted CD8+T-lymphocytes, CD4+ T-lymphocytes, B cells, natural killer cells, monocytes and granulocytes

<sup>b</sup> Test for heterogeneity across groups if evidence of deviation from linearity



**Table S9**

Weighted<sup>a</sup> regression models of the association between childhood social class (age 4) with four DNA methylation age acceleration markers measured at age 53 in men and women (n=1273)

|                               | <b>Horvath AA<sup>b</sup></b> | <b>Hannum AA<sup>b</sup></b> | <b>PhenoAge AA<sup>b</sup></b> | <b>GrimAge AA<sup>b</sup></b> |
|-------------------------------|-------------------------------|------------------------------|--------------------------------|-------------------------------|
| <b>Childhood social class</b> | Coeff. (95% CI)               | Coeff. (95% CI)              | Coeff. (95% CI)                | Coeff. (95% CI)               |
| Professional                  | Reference                     | Reference                    | Reference                      | Reference                     |
| Intermediate                  | 1.03 (-0.04, 2.09)            | 0.62 (-0.48, 1.72)           | 1.77 (0.30, 3.25)              | 1.23 (-0.05, 2.52)            |
| Skilled non-manual            | 0.42 (-0.63, 1.48)            | 0.82 (-0.27, 1.90)           | 1.85 (0.39, 3.30)              | 0.85 (-0.42, 2.12)            |
| Skilled manual                | 0.63 (-0.46, 1.73)            | 1.29 (0.17, 2.41)            | 3.05 (1.54, 4.56)              | 2.44 (1.12, 3.76)             |
| Partly Skilled                | 0.47 (-0.60, 1.54)            | 1.35 (0.25, 2.44)            | 2.40 (0.93, 3.87)              | 2.09 (0.80, 3.37)             |
| Unskilled                     | 1.03 (-0.37, 2.43)            | 2.06 (0.63, 3.49)            | 3.94 (2.02, 5.87)              | 2.85 (1.16, 4.53)             |
|                               | <b>Horvath AA<sup>c</sup></b> | <b>Hannum AA<sup>c</sup></b> | <b>PhenoAge AA<sup>c</sup></b> | <b>GrimAge AA<sup>c</sup></b> |
| <b>Childhood social class</b> | Coeff. (95% CI)               | Coeff. (95% CI)              | Coeff. (95% CI)                | Coeff. (95% CI)               |
| Professional                  | Reference                     | Reference                    | Reference                      | Reference                     |
| Intermediate                  | 0.95 (-0.11, 2.00)            | 0.44 (-0.52, 1.40)           | 1.26 (-0.01, 2.52)             | 0.99 (-0.22, 2.20)            |
| Skilled non-manual            | 0.24 (-0.80, 1.28)            | 0.31 (-0.64, 1.25)           | 0.77 (-0.48, 2.01)             | 0.27 (-0.92, 1.47)            |
| Skilled manual                | 0.47 (-0.61, 1.56)            | 0.70 (-0.28, 1.68)           | 1.82 (0.53, 3.12)              | 1.72 (0.47, 2.96)             |
| Partly Skilled                | 0.28 (-0.77, 1.34)            | 0.79 (-0.16, 1.75)           | 1.27 (0.01, 2.53)              | 1.40 (0.19, 2.61)             |
| Unskilled                     | 0.61 (-0.78, 1.99)            | 0.90 (-0.36, 2.15)           | 1.93 (0.27, 3.59)              | 1.73 (0.14, 3.32)             |

AA age acceleration

<sup>a</sup> Weighted using the NSHD social stratification weights to take account of the sample design

<sup>b</sup> Adjusted for sex

<sup>c</sup> Adjusted for sex, naïve and exhausted CD8+T-lymphocytes, CD4+ T-lymphocytes, B cells, natural killer cells, monocytes and granulocytes

**Table S10**

Weighted<sup>a</sup> regression models of the association between adult social class (age 53) with four DNA methylation age acceleration markers measured at age 53 in men and women (n=1273)

|                           | <b>Horvath AA<sup>b</sup></b> | <b>Hannum AA<sup>b</sup></b> | <b>PhenoAge AA<sup>b</sup></b> | <b>GrimAge AA<sup>b</sup></b> |
|---------------------------|-------------------------------|------------------------------|--------------------------------|-------------------------------|
| <b>Adult social class</b> | Coeff. (95% CI)               | Coeff. (95% CI)              | Coeff. (95% CI)                | Coeff. (95% CI)               |
| Professional              | Reference                     | Reference                    | Reference                      | Reference                     |
| Intermediate              | -0.20 (-1.15, 0.74)           | 0.43 (-0.54, 1.40)           | 0.41 (-0.91, 1.72)             | 0.90 (-0.23, 2.04)            |
| Skilled non-manual        | 0.06 (-0.96, 1.08)            | 0.88 (-0.16, 1.92)           | 1.10 (-0.31, 2.51)             | 1.38 (0.16, 2.60)             |
| Skilled manual            | 0.85 (-0.18, 1.87)            | 1.22 (0.17, 2.27)            | 1.13 (-0.30, 2.55)             | 2.86 (1.63, 4.09)             |
| Partly Skilled            | -0.33 (-1.42, 0.77)           | -0.14 (-1.26, 0.99)          | 1.09 (-0.43, 2.61)             | 2.08 (0.77, 3.40)             |
| Unskilled                 | -0.51 (-1.90, 0.88)           | 0.52 (-0.91, 1.95)           | 2.19 (0.26, 4.12)              | 3.55 (1.88, 5.22)             |
|                           | <b>Horvath AA<sup>c</sup></b> | <b>Hannum AA<sup>c</sup></b> | <b>PhenoAge AA<sup>c</sup></b> | <b>GrimAge AA<sup>c</sup></b> |
| <b>Adult social class</b> | Coeff. (95% CI)               | Coeff. (95% CI)              | Coeff. (95% CI)                | Coeff. (95% CI)               |
| Professional              | Reference                     | Reference                    | Reference                      | Reference                     |
| Intermediate              | -0.36 (-1.29, 0.57)           | -0.03 (-0.88, 0.81)          | -0.37 (-1.49, 0.76)            | 0.59 (-0.48, 1.65)            |
| Skilled non-manual        | -0.09 (-1.10, 0.92)           | 0.41 (-0.50, 1.33)           | 0.23 (-0.98, 1.44)             | 1.08 (-0.07, 2.22)            |
| Skilled manual            | 0.73 (-0.28, 1.75)            | 0.65 (-0.27, 1.56)           | 0.09 (-1.13, 1.31)             | 2.20 (1.05, 3.36)             |
| Partly Skilled            | -0.38 (-1.46, 0.70)           | -0.40 (-1.38, 0.58)          | 0.51 (-0.79, 1.81)             | 1.77 (0.54, 3.01)             |
| Unskilled                 | -0.91 (-2.29, 0.46)           | -0.59 (-1.84, 0.66)          | 0.30 (-1.36, 1.96)             | 2.90 (1.33, 4.47)             |

AA age acceleration

<sup>a</sup> Weighted using the NSHD social stratification weights to take account of the sample design

<sup>b</sup> Adjusted for sex

<sup>c</sup> Adjusted for sex, naïve and exhausted CD8+T-lymphocytes, CD4+ T-lymphocytes, B cells, natural killer cells, monocytes and granulocytes

**Table S11**

Weighted<sup>a</sup> regression models of the association between intergenerational social class change (age 53) with four DNA methylation age acceleration markers measured at age 53 in men and women (n=1273)

|                                              | <b>Horvath AA<sup>b</sup></b> | <b>Hannum AA<sup>b</sup></b> | <b>PhenoAge AA<sup>b</sup></b> | <b>GrimAge AA<sup>b</sup></b> |
|----------------------------------------------|-------------------------------|------------------------------|--------------------------------|-------------------------------|
| <b>Intergenerational social class change</b> | Coeff. (95% CI)               | Coeff. (95% CI)              | Coeff. (95% CI)                | Coeff. (95% CI)               |
| Stable non-manual                            | Reference                     | Reference                    | Reference                      | Reference                     |
| Non-manual to manual                         | 0.76 (-0.11, 1.64)            | 0.45 (-0.45, 1.34)           | 0.63 (-0.58, 1.84)             | 1.73 (0.69, 2.78)             |
| Manual to non-manual                         | 0.01 (-0.60, 0.62)            | 0.99 (0.36, 1.62)            | 1.16 (0.31, 2.01)              | 1.08 (0.34, 1.81)             |
| Stable manual                                | 0.14 (-0.50, 0.79)            | 0.64 (-0.03, 1.30)           | 1.49 (0.60, 2.38)              | 2.44 (1.67, 3.21)             |
|                                              | <b>Horvath AA<sup>c</sup></b> | <b>Hannum AA<sup>c</sup></b> | <b>PhenoAge AA<sup>c</sup></b> | <b>GrimAge AA<sup>c</sup></b> |
| <b>Intergenerational social class change</b> | Coeff. (95% CI)               | Coeff. (95% CI)              | Coeff. (95% CI)                | Coeff. (95% CI)               |
| Stable non-manual                            | Reference                     | Reference                    | Reference                      | Reference                     |
| Non-manual to manual                         | 0.69 (-0.17, 1.55)            | 0.42 (-0.36, 1.20)           | 0.47 (-0.56, 1.50)             | 1.63 (0.65, 2.61)             |
| Manual to non-manual                         | -0.11 (-0.72, 0.49)           | 0.70 (0.15, 1.24)            | 0.64 (-0.09, 1.37)             | 0.77 (0.09, 1.46)             |
| Stable manual                                | 0.09 (-0.55, 0.72)            | 0.28 (-0.30, 0.85)           | 0.84 (0.08, 1.61)              | 1.93 (1.21, 2.65)             |

AA age acceleration

<sup>a</sup> Weighted using the NSHD social stratification weights to take account of the sample design

<sup>b</sup> Adjusted for sex

<sup>c</sup> Adjusted for sex, naïve and exhausted CD8+T-lymphocytes, CD4+ T-lymphocytes, B cells, natural killer cells, monocytes and granulocytes

**Table S12**

Weighted<sup>a</sup> regression models of the association of childhood social class (age 4) and adult social class (age 53), respectively, with four DNA methylation age acceleration markers measured at age 53 in men and women (n=1273)

|                               | <b>Horvath AA<sup>b</sup></b> | <b>Hannum AA<sup>b</sup></b> | <b>PhenoAge AA<sup>b</sup></b> | <b>GrimAge AA<sup>b</sup></b> | <b>Horvath AA<sup>c</sup></b> | <b>Hannum AA<sup>c</sup></b> | <b>PhenoAge AA<sup>c</sup></b> | <b>GrimAge AA<sup>c</sup></b> |
|-------------------------------|-------------------------------|------------------------------|--------------------------------|-------------------------------|-------------------------------|------------------------------|--------------------------------|-------------------------------|
| <b>Childhood Social Class</b> | Coeff. (95% CI)               | Coeff. (95% CI)              | Coeff. (95% CI)                | Coeff. (95% CI)               | Coeff. (95% CI)               | Coeff. (95% CI)              | Coeff. (95% CI)                | Coeff. (95% CI)               |
| Non-manual                    | Reference                     | Reference                    | Reference                      | Reference                     | Reference                     | Reference                    | Reference                      | Reference                     |
| Manual                        | -0.07 (-0.60, 0.46)           | 0.75 (0.21, 1.29)            | 1.19 (0.46, 1.92)              | 1.36 (0.72, 2.00)             | -0.15 (-0.68, 0.37)           | 0.43 (-0.04, 0.90)           | 0.64 (0.02, 1.27)              | 0.98 (0.38, 1.58)             |
|                               | <b>Horvath AA<sup>b</sup></b> | <b>Hannum AA<sup>b</sup></b> | <b>PhenoAge AA<sup>b</sup></b> | <b>GrimAge AA<sup>b</sup></b> | <b>Horvath AA<sup>c</sup></b> | <b>Hannum AA<sup>c</sup></b> | <b>PhenoAge AA<sup>c</sup></b> | <b>GrimAge AA<sup>c</sup></b> |
| <b>Adult Social Class</b>     | Coeff. (95% CI)               | Coeff. (95% CI)              | Coeff. (95% CI)                | Coeff. (95% CI)               | Coeff. (95% CI)               | Coeff. (95% CI)              | Coeff. (95% CI)                | Coeff. (95% CI)               |
| Non-manual                    | Reference                     | Reference                    | Reference                      | Reference                     | Reference                     | Reference                    | Reference                      | Reference                     |
| Manual                        | 0.30 (-0.18, 0.77)            | 0.06 (-0.43, 0.55)           | 0.66 (-0.01, 1.32)             | 1.68 (1.11, 2.26)             | 0.30 (-0.17, 0.78)            | -0.06 (-0.48, 0.37)          | 0.41 (-0.16, 0.97)             | 1.44 (0.90, 1.97)             |

AA age acceleration

<sup>a</sup> Weighted using the NSHD social stratification weights to take account of the sample design

<sup>b</sup> Adjusted for sex

<sup>c</sup> Adjusted for sex, naïve and exhausted CD8+T-lymphocytes, CD4+ T-lymphocytes, B cells, natural killer cells, monocytes and granulocytes

**Table S13**

Weighted<sup>a</sup> regression models of the association between educational attainment (age 53) with four DNA methylation age acceleration markers measured at age 53 in men and women (n=1361)

|                               | <b>Horvath AA<sup>b</sup></b> | <b>Hannum AA<sup>b</sup></b> | <b>PhenoAge AA<sup>b</sup></b> | <b>GrimAge AA<sup>b</sup></b> |
|-------------------------------|-------------------------------|------------------------------|--------------------------------|-------------------------------|
| <b>Educational attainment</b> | Coeff. (95% CI)               | Coeff. (95% CI)              | Coeff. (95% CI)                | Coeff. (95% CI)               |
| Higher education              | Reference                     | Reference                    | Reference                      | Reference                     |
| School post 16                | -0.41 (-1.22, 0.40)           | 0.20 (-0.64, 1.03)           | 0.31 (-0.82, 1.43)             | 1.40 (0.43, 2.36)             |
| Vocational/school to 16       | -0.40 (-1.22, 0.41)           | 0.62 (-0.22, 1.45)           | 1.09 (-0.04, 2.21)             | 2.32 (1.35, 3.30)             |
| No qualifications             | -0.30 (-1.10, 0.49)           | 0.23 (-0.59, 1.05)           | 1.09 (-0.02, 2.20)             | 3.90 (2.95, 4.86)             |
|                               | <b>Horvath AA<sup>c</sup></b> | <b>Hannum AA<sup>c</sup></b> | <b>PhenoAge AA<sup>c</sup></b> | <b>GrimAge AA<sup>c</sup></b> |
| <b>Educational attainment</b> | Coeff. (95% CI)               | Coeff. (95% CI)              | Coeff. (95% CI)                | Coeff. (95% CI)               |
| Higher education              | Reference                     | Reference                    | Reference                      | Reference                     |
| School post 16                | -0.44 (-1.24, 0.35)           | 0.10 (-0.62, 0.81)           | 0.08 (-0.89, 1.04)             | 1.22 (0.31, 2.12)             |
| Vocational/school to 16       | -0.48 (-1.28, 0.32)           | 0.34 (-0.39, 1.06)           | 0.57 (-0.40, 1.54)             | 1.98 (1.07, 2.89)             |
| No qualifications             | -0.41 (-1.20, 0.38)           | -0.25 (-0.96, 0.47)          | 0.27 (-0.69, 1.23)             | 3.33 (2.43, 4.23)             |

AA age acceleration

<sup>a</sup> Weighted using the NSHD social stratification weights to take account of the sample design

<sup>b</sup> Adjusted for sex

<sup>c</sup> Adjusted for sex, naïve and exhausted CD8+T-lymphocytes, CD4+ T-lymphocytes, B cells, natural killer cells, monocytes and granulocytes

**Table S14**

Weighted<sup>a</sup> regression models of the association between household income in pounds/year (age 53) with four DNA methylation age acceleration markers measured at age 53 in men and women (n=1315)

|                         | <b>Horvath AA<sup>b</sup></b> | <b>Hannum AA<sup>b</sup></b> | <b>PhenoAge AA<sup>b</sup></b> | <b>GrimAge AA<sup>b</sup></b> |
|-------------------------|-------------------------------|------------------------------|--------------------------------|-------------------------------|
| <b>Household income</b> | Coeff. (95% CI)               | Coeff. (95% CI)              | Coeff. (95% CI)                | Coeff. (95% CI)               |
| £45,000 or more         | Reference                     | Reference                    | Reference                      | Reference                     |
| £35,000 - £44,999       | 0.64 (-0.38, 1.66)            | 0.73 (-0.31, 1.77)           | 1.05 (-0.35, 2.45)             | 1.30 (0.09, 2.52)             |
| £30,000 - £34,999       | 0.28 (-0.65, 1.20)            | 0.73 (-0.20, 1.67)           | 0.73 (-0.54, 2.00)             | 0.62 (-0.49, 1.72)            |
| £25,000 - £29,999       | 0.53 (-0.49, 1.56)            | 0.27 (-0.77, 1.31)           | -0.02 (-1.42, 1.38)            | 0.15 (-1.06, 1.37)            |
| £20,000 - £24,999       | 0.64 (-0.26, 1.54)            | 0.84 (-0.07, 1.76)           | 1.35 (0.12, 2.59)              | 1.29 (0.22, 2.37)             |
| £15,000 - £19,999       | 0.35 (-0.56, 1.26)            | 0.93 (0.00, 1.86)            | 1.75 (0.50, 3.01)              | 2.51 (1.42, 3.60)             |
| £10,000 - £14,999       | 0.17 (-0.74, 1.07)            | 0.70 (-0.22, 1.62)           | 1.45 (0.20, 2.70)              | 2.45 (1.37, 3.53)             |
| Less than £10,000       | 0.69 (-0.26, 1.63)            | 1.42 (0.46, 2.37)            | 2.32 (1.02, 3.62)              | 3.62 (2.49, 4.75)             |
|                         | <b>Horvath AA<sup>c</sup></b> | <b>Hannum AA<sup>c</sup></b> | <b>PhenoAge AA<sup>c</sup></b> | <b>GrimAge AA<sup>c</sup></b> |
| <b>Household income</b> | Coeff. (95% CI)               | Coeff. (95% CI)              | Coeff. (95% CI)                | Coeff. (95% CI)               |
| £45,000 or more         | Reference                     | Reference                    | Reference                      | Reference                     |
| £35,000 - £44,999       | 0.62 (-0.39, 1.62)            | 0.34 (-0.57, 1.25)           | 0.06 (-1.16, 1.27)             | 0.71 (-0.44, 1.85)            |
| £30,000 - £34,999       | 0.13 (-0.78, 1.04)            | 0.23 (-0.59, 1.04)           | 0.01 (-1.09, 1.10)             | 0.25 (-0.78, 1.28)            |
| £25,000 - £29,999       | 0.58 (-0.42, 1.59)            | 0.19 (-0.71, 1.10)           | -0.22 (-1.43, 0.99)            | 0.01 (-1.12, 1.15)            |
| £20,000 - £24,999       | 0.53 (-0.36, 1.42)            | 0.23 (-0.57, 1.03)           | 0.18 (-0.89, 1.25)             | 0.55 (-0.46, 1.55)            |
| £15,000 - £19,999       | 0.22 (-0.68, 1.13)            | 0.26 (-0.55, 1.07)           | 0.57 (-0.51, 1.66)             | 1.81 (0.79, 2.83)             |
| £10,000 - £14,999       | 0.13 (-0.77, 1.03)            | 0.08 (-0.73, 0.89)           | 0.25 (-0.83, 1.34)             | 1.62 (0.60, 2.64)             |
| Less than £10,000       | 0.49 (-0.45, 1.43)            | 0.56 (-0.28, 1.40)           | 0.83 (-0.30, 1.96)             | 2.84 (1.78, 3.90)             |

AA age acceleration

<sup>a</sup> Weighted using the NSHD social stratification weights to take account of the sample design

<sup>b</sup> Adjusted for sex

<sup>c</sup> Adjusted for sex, naïve and exhausted CD8+T-lymphocytes, CD4+ T-lymphocytes, B cells, natural killer cells, monocytes and granulocytes

**Table 15**

Sex-adjusted regression models of the association of childhood social class (age 4) with the eight z-score standardised GrimAge DNA methylation-based surrogate biomarkers measured at age 53 in men and women (n=1273)

|                               | DNAm packyrs <sup>a</sup> | DNAm ADM <sup>a</sup> | DNAm B2M <sup>a</sup> | DNAm Cystatin C <sup>a</sup> | DNAm GDF-15 <sup>a</sup> | DNAm Leptin <sup>a</sup> | DNAm PAI-1 <sup>a</sup> | DNAm TIMP-1 <sup>a</sup> |
|-------------------------------|---------------------------|-----------------------|-----------------------|------------------------------|--------------------------|--------------------------|-------------------------|--------------------------|
| <b>Childhood social class</b> | Coeff. (95% CI)           | Coeff. (95% CI)       | Coeff. (95% CI)       | Coeff. (95% CI)              | Coeff. (95% CI)          | Coeff. (95% CI)          | Coeff. (95% CI)         | Coeff. (95% CI)          |
| Professional                  | Reference                 | Reference             | Reference             | Reference                    | Reference                | Reference                | Reference               | Reference                |
| Intermediate                  | 0.17 (-0.09, 0.42)        | 0.12 (-0.07, 0.32)    | 0.18 (-0.09, 0.44)    | 0.15 (-0.12, 0.41)           | 0.27 (0.01, 0.54)        | 0.05 (-0.10, 0.19)       | 0.07 (-0.17, 0.30)      | 0.32 (0.07, 0.57)        |
| Skilled non-manual            | 0.16 (-0.10, 0.41)        | 0.08 (-0.12, 0.27)    | -0.02 (-0.27, 0.24)   | 0.08 (-0.18, 0.34)           | 0.14 (-0.12, 0.41)       | 0.06 (-0.08, 0.21)       | 0.00 (-0.23, 0.24)      | 0.10 (-0.15, 0.35)       |
| Skilled manual                | 0.43 (0.18, 0.67)         | 0.17 (-0.02, 0.35)    | 0.23 (-0.02, 0.48)    | 0.23 (-0.02, 0.48)           | 0.42 (0.17, 0.67)        | 0.07 (-0.06, 0.21)       | 0.19 (-0.03, 0.42)      | 0.41 (0.17, 0.65)        |
| Partly Skilled                | 0.35 (0.09, 0.60)         | 0.12 (-0.07, 0.31)    | 0.21 (-0.05, 0.47)    | 0.23 (-0.03, 0.49)           | 0.28 (0.02, 0.54)        | 0.02 (-0.13, 0.16)       | 0.16 (-0.07, 0.39)      | 0.41 (0.16, 0.66)        |
| Unskilled                     | 0.48 (0.16, 0.81)         | 0.32 (0.07, 0.56)     | 0.26 (-0.07, 0.58)    | 0.41 (0.08, 0.74)            | 0.37 (0.04, 0.70)        | -0.05 (-0.23, 0.13)      | 0.17 (-0.12, 0.47)      | 0.32 (0.00, 0.64)        |
| P-value for trend             | <0.001                    | 0.04                  | 0.02 <sup>b</sup>     | 0.01                         | 0.00 <sup>b</sup>        | 0.64                     | 0.03                    | <0.001 <sup>b</sup>      |

DNAm packyrs DNA methylation-based surrogate of smoking pack-years

DNAm ADM DNA methylation-based surrogate of adrenomedullin levels

DNAm B2M DNA methylation-based surrogate of beta-2 microglobulin

DNAm Cystatin C DNA methylation-based surrogate of cystatin C

DNAm GDF-15 DNA methylation-based surrogate of growth differentiation factor 15

DNAm Leptin DNA methylation-based surrogate of leptin

DNAm PAI-1 DNA methylation-based surrogate of plasminogen activation inhibitor 1

DNAm TIMP-1 DNA methylation-based surrogate of tissue inhibitor metalloproteinase 1

<sup>a</sup>Standardised variable

<sup>b</sup>Test for heterogeneity across groups if evidence of deviation from linearity

**Table 16**

Sex-adjusted regression models of the association of adult social class (age 53) with the eight z-score standardised GrimAge DNA methylation-based surrogate biomarkers measured at age 53 in men and women (n=1273)

|                           | DNAm packyrs <sup>a</sup> | DNAm ADM <sup>a</sup> | DNAm B2M <sup>a</sup> | DNAm Cystatin C <sup>a</sup> | DNAm GDF-15 <sup>a</sup> | DNAm Leptin <sup>a</sup> | DNAm PAI-1 <sup>a</sup> | DNAm TIMP-1 <sup>a</sup> |
|---------------------------|---------------------------|-----------------------|-----------------------|------------------------------|--------------------------|--------------------------|-------------------------|--------------------------|
| <b>Adult social class</b> | Coeff. (95% CI)           | Coeff. (95% CI)       | Coeff. (95% CI)       | Coeff. (95% CI)              | Coeff. (95% CI)          | Coeff. (95% CI)          | Coeff. (95% CI)         | Coeff. (95% CI)          |
| Professional              | Reference                 | Reference             | Reference             | Reference                    | Reference                | Reference                | Reference               | Reference                |
| Intermediate              | 0.11 (-0.12, 0.34)        | 0.14 (-0.04, 0.31)    | 0.23 (-0.01, 0.46)    | 0.08 (-0.16, 0.31)           | 0.16 (-0.08, 0.40)       | 0.11 (-0.02, 0.24)       | 0.03 (-0.18, 0.24)      | 0.18 (-0.05, 0.41)       |
| Skilled non-manual        | 0.18 (-0.07, 0.42)        | 0.27 (0.09, 0.46)     | 0.35 (0.10, 0.60)     | 0.19 (-0.06, 0.44)           | 0.07 (-0.18, 0.33)       | 0.11 (-0.03, 0.25)       | 0.01 (-0.22, 0.23)      | 0.29 (0.05, 0.54)        |
| Skilled manual            | 0.51 (0.26, 0.76)         | 0.21 (0.02, 0.40)     | 0.48 (0.23, 0.73)     | 0.35 (0.10, 0.60)            | 0.34 (0.08, 0.59)        | 0.09 (-0.05, 0.23)       | 0.11 (-0.12, 0.34)      | 0.41 (0.17, 0.66)        |
| Partly Skilled            | 0.40 (0.13, 0.66)         | 0.22 (0.01, 0.42)     | 0.24 (-0.03, 0.51)    | 0.06 (-0.21, 0.33)           | 0.16 (-0.11, 0.44)       | 0.15 (-0.00, 0.30)       | -0.05 (-0.30, 0.19)     | 0.31 (0.05, 0.57)        |
| Unskilled                 | 0.65 (0.31, 0.98)         | 0.32 (0.06, 0.57)     | 0.62 (0.28, 0.96)     | 0.48 (0.14, 0.82)            | 0.20 (-0.15, 0.54)       | 0.17 (-0.02, 0.36)       | 0.07 (-0.24, 0.38)      | 0.44 (0.10, 0.77)        |
| P-value for trend         | <0.001                    | 0.01                  | <0.001 <sup>b</sup>   | <0.001 <sup>b</sup>          | 0.11                     | 0.16                     | 0.93                    | <0.001                   |

DNAm packyrs DNA methylation-based surrogate of smoking pack-years

DNAm ADM DNA methylation-based surrogate of adrenomedullin levels

DNAm B2M DNA methylation-based surrogate of beta-2 microglobulin

DNAm Cystatin C DNA methylation-based surrogate of cystatin C

DNAm GDF-15 DNA methylation-based surrogate of growth differentiation factor 15

DNAm Leptin DNA methylation-based surrogate of leptin

DNAm PAI-1 DNA methylation-based surrogate of plasminogen activation inhibitor 1

DNAm TIMP-1 DNA methylation-based surrogate of tissue inhibitor metalloproteinase 1

<sup>a</sup>Standardised variable

<sup>b</sup>Test for heterogeneity across groups if evidence of deviation from linearity



**Table 17**

Sex-adjusted regression models of the association of highest educational attainment (age 26) with the eight z-score standardised GrimAge DNA methylation-based surrogate biomarkers measured at age 53 in men and women (n=1361)

|                               | DNAm packyrs <sup>a</sup> | DNAm ADM <sup>a</sup> | DNAm B2M <sup>a</sup> | DNAm Cystatin C <sup>a</sup> | DNAm GDF-15 <sup>a</sup> | DNAm Leptin <sup>a</sup> | DNAm PAI-1 <sup>a</sup> | DNAm TIMP-1 <sup>a</sup> |
|-------------------------------|---------------------------|-----------------------|-----------------------|------------------------------|--------------------------|--------------------------|-------------------------|--------------------------|
| <b>Educational attainment</b> | Coeff. (95% CI)           | Coeff. (95% CI)       | Coeff. (95% CI)       | Coeff. (95% CI)              | Coeff. (95% CI)          | Coeff. (95% CI)          | Coeff. (95% CI)         | Coeff. (95% CI)          |
| Higher education              | Reference                 | Reference             | Reference             | Reference                    | Reference                | Reference                | Reference               | Reference                |
| School post 16                | 0.33 (0.14, 0.53)         | 0.00 (-0.15, 0.15)    | 0.10 (-0.10, 0.30)    | 0.10 (-0.10, 0.30)           | 0.09 (-0.11, 0.29)       | -0.00 (-0.11, 0.11)      | 0.00 (-0.18, 0.19)      | 0.07 (-0.12, 0.27)       |
| Vocational/school to 16       | 0.51 (0.32, 0.70)         | 0.03 (-0.12, 0.18)    | 0.24 (0.04, 0.44)     | 0.14 (-0.06, 0.34)           | 0.20 (-0.00, 0.39)       | 0.01 (-0.10, 0.12)       | 0.12 (-0.06, 0.30)      | 0.20 (0.00, 0.39)        |
| No qualifications             | 0.83 (0.65, 1.02)         | 0.12 (-0.03, 0.26)    | 0.28 (0.08, 0.47)     | 0.29 (0.10, 0.49)            | 0.39 (0.20, 0.58)        | 0.01 (-0.09, 0.12)       | 0.13 (-0.04, 0.31)      | 0.35 (0.16, 0.54)        |
| P-value for trend             | <0.001                    | 0.02                  | 0.00                  | <0.001                       | <0.001                   | 0.68                     | 0.03                    | <0.001                   |

DNAm packyrs DNA methylation-based surrogate of smoking pack-years

DNAm ADM DNA methylation-based surrogate of adrenomedullin levels

DNAm B2M DNA methylation-based surrogate of beta-2 microglobulin

DNAm Cystatin C DNA methylation-based surrogate of cystatin C

DNAm GDF-15 DNA methylation-based surrogate of growth differentiation factor 15

DNAm Leptin DNA methylation-based surrogate of leptin

DNAm PAI-1 DNA methylation-based surrogate of plasminogen activation inhibitor 1

DNAm TIMP-1 DNA methylation-based surrogate of tissue inhibitor metalloproteinase 1

<sup>a</sup>Standardised variable

**Table 18**

Sex-adjusted regression models of the association of household income (age 53) with the eight z-score standardised GrimAge DNA methylation-based surrogate biomarkers measured at age 53 in men and women (n=1315)

|                         | DNAm packyrs <sup>a</sup> | DNAm ADM <sup>a</sup> | DNAm B2M <sup>a</sup> | DNAm Cystatin C <sup>a</sup> | DNAm GDF-15 <sup>a</sup> | DNAm Leptin <sup>a</sup> | DNAm PAI-1 <sup>a</sup> | DNAm TIMP-1 <sup>a</sup> |
|-------------------------|---------------------------|-----------------------|-----------------------|------------------------------|--------------------------|--------------------------|-------------------------|--------------------------|
| <b>Household income</b> | Coeff. (95% CI)           | Coeff. (95% CI)       | Coeff. (95% CI)       | Coeff. (95% CI)              | Coeff. (95% CI)          | Coeff. (95% CI)          | Coeff. (95% CI)         | Coeff. (95% CI)          |
| £45,000 or more         | Reference                 | Reference             | Reference             | Reference                    | Reference                | Reference                | Reference               | Reference                |
| £35,000 - £44,999       | 0.24 (0.00, 0.49)         | 0.11 (-0.08, 0.30)    | 0.10 (-0.15, 0.35)    | 0.12 (-0.13, 0.38)           | 0.17 (-0.08, 0.43)       | 0.03 (-0.11, 0.17)       | -0.03 (-0.26, 0.20)     | 0.16 (-0.09, 0.40)       |
| £30,000 - £34,999       | 0.09 (-0.13, 0.31)        | 0.00 (-0.17, 0.17)    | 0.23 (0.01, 0.46)     | 0.07 (-0.16, 0.29)           | 0.04 (-0.19, 0.27)       | -0.04 (-0.17, 0.08)      | 0.12 (-0.09, 0.33)      | 0.10 (-0.12, 0.32)       |
| £25,000 - £29,999       | 0.01 (-0.23, 0.25)        | -0.03 (-0.22, 0.16)   | 0.03 (-0.22, 0.28)    | 0.09 (-0.17, 0.34)           | 0.03 (-0.23, 0.28)       | 0.00 (-0.14, 0.14)       | 0.02 (-0.21, 0.25)      | 0.10 (-0.14, 0.35)       |
| £20,000 - £24,999       | 0.23 (0.02, 0.45)         | 0.07 (-0.09, 0.24)    | 0.35 (0.13, 0.57)     | 0.16 (-0.06, 0.38)           | 0.09 (-0.13, 0.31)       | 0.06 (-0.06, 0.19)       | 0.04 (-0.17, 0.24)      | 0.18 (-0.04, 0.39)       |
| £15,000 - £19,999       | 0.46 (0.25, 0.68)         | 0.19 (0.02, 0.35)     | 0.37 (0.14, 0.59)     | 0.29 (0.07, 0.52)            | 0.26 (0.04, 0.49)        | 0.10 (-0.02, 0.22)       | 0.01 (-0.20, 0.21)      | 0.36 (0.15, 0.58)        |
| £10,000 - £14,999       | 0.47 (0.25, 0.68)         | 0.15 (-0.02, 0.31)    | 0.29 (0.07, 0.52)     | 0.28 (0.06, 0.50)            | 0.22 (-0.00, 0.45)       | -0.00 (-0.13, 0.12)      | 0.09 (-0.12, 0.30)      | 0.27 (0.05, 0.49)        |
| Less than £10,000       | 0.67 (0.45, 0.89)         | 0.25 (0.08, 0.43)     | 0.46 (0.23, 0.69)     | 0.41 (0.17, 0.64)            | 0.37 (0.14, 0.61)        | 0.09 (-0.04, 0.22)       | 0.19 (-0.03, 0.40)      | 0.39 (0.16, 0.62)        |
| P-value for trend       | 0.00 <sup>b</sup>         | 0.00                  | <0.001                | <0.001                       | 0.00                     | 0.12                     | 0.12                    | <0.001                   |

DNAm packyrs DNA methylation-based surrogate of smoking pack-years

DNAm ADM DNA methylation-based surrogate of adrenomedullin levels

DNAm B2M DNA methylation-based surrogate of beta-2 microglobulin

DNAm Cystatin C DNA methylation-based surrogate of cystatin C

DNAm GDF-15 DNA methylation-based surrogate of growth differentiation factor 15

DNAm Leptin DNA methylation-based surrogate of leptin

DNA<sub>m</sub> PAI-1 DNA methylation-based surrogate of plasminogen activation inhibitor 1  
DNA<sub>m</sub> TIMP-1 DNA methylation-based surrogate of tissue inhibitor metalloproteinase 1

<sup>a</sup>Standardised variable

<sup>b</sup>Test for heterogeneity across groups if evidence of deviation from linearity

**Table S19**

Descriptive statistics of the age 53 sample by DNAm AA data availability

| <b>DNAm AA data</b>                     | No          | Yes         | All          |
|-----------------------------------------|-------------|-------------|--------------|
| Variable                                | N (%)       | N (%)       | N (%)        |
| <b>Sex</b>                              |             |             |              |
| Men                                     | 816 (49.19) | 656 (47.67) | 1472 (48.5)  |
| Women                                   | 843 (50.81) | 720 (52.33) | 1563 (51.5)  |
| Total                                   | 1659 (100)  | 1376 (100)  | 3035 (100)   |
| P-value chi-squared test                |             |             | 0.41         |
| <b>Childhood social class (age 4)</b>   |             |             |              |
| Professional                            | 87 (6.03)   | 77 (5.75)   | 164 (5.89)   |
| Intermediate                            | 251 (17.39) | 236 (17.61) | 487 (17.5)   |
| Skilled non-manual                      | 288 (19.96) | 248 (18.51) | 536 (19.26)  |
| Skilled manual                          | 422 (29.24) | 424 (31.64) | 846 (30.4)   |
| Partly Skilled                          | 292 (20.24) | 282 (21.04) | 574 (20.63)  |
| Unskilled                               | 103 (7.14)  | 73 (5.45)   | 176 (6.32)   |
| Total                                   | 1443 (100)  | 1340 (100)  | 2783 (100)   |
| P-value chi-squared test                |             |             | 0.35         |
| <b>Adult social class (age 53)</b>      |             |             |              |
| Professional                            | 118 (8.02)  | 89 (6.82)   | 207 (7.46)   |
| Intermediate                            | 560 (38.07) | 484 (37.09) | 1044 (37.61) |
| Skilled non-manual                      | 316 (21.48) | 305 (23.37) | 621 (22.37)  |
| Skilled manual                          | 279 (18.97) | 213 (16.32) | 492 (17.72)  |
| Partly Skilled                          | 147 (9.99)  | 156 (11.95) | 303 (10.91)  |
| Unskilled                               | 51 (3.47)   | 58 (4.44)   | 109 (3.93)   |
| Total                                   | 1471 (100)  | 1305 (100)  | 2776 (100)   |
| P-value chi-squared test                |             |             | 0.09         |
| <b>Educational attainment (age 26)</b>  |             |             |              |
| Higher education                        | 148 (9.83)  | 132 (9.7)   | 280 (9.77)   |
| School post 16                          | 381 (25.32) | 349 (25.64) | 730 (25.47)  |
| Vocational/school to                    | 404 (26.84) | 397 (29.17) | 801 (27.95)  |
| No qualifications                       | 572 (38.01) | 483 (35.49) | 1055 (36.81) |
| Total                                   | 1505 (100)  | 1361 (100)  | 2866 (100)   |
| P-value chi-squared test                |             |             | 0.45         |
| <b>Household income (£/yr) (age 53)</b> |             |             |              |
| 45,000 or more                          | 189 (12.47) | 124 (9.43)  | 313 (11.06)  |
| 35,000 - 44,999                         | 158 (10.42) | 117 (8.9)   | 275 (9.71)   |
| 30,000 - 34,999                         | 197 (12.99) | 181 (13.76) | 378 (13.35)  |
| 25,000 - 29,999                         | 110 (7.26)  | 117 (8.9)   | 227 (8.02)   |
| 20,000 - 24,999                         | 204 (13.46) | 210 (15.97) | 414 (14.62)  |
| 15,000 - 19,999                         | 233 (15.37) | 194 (14.75) | 427 (15.08)  |
| 10,000 - 14,999                         | 209 (13.79) | 203 (15.44) | 412 (14.55)  |
| Less than 10,000                        | 216 (14.25) | 169 (12.85) | 385 (13.6)   |
| Total                                   | 1516 (100)  | 1315 (100)  | 2831 (100)   |
| P-value chi-squared test                |             |             | 0.03         |
| <b>Smoking history upto age 53</b>      |             |             |              |
| Current smoker                          | 362 (22.44) | 333 (24.22) | 695 (23.26)  |
| Ex-smoker                               | 788 (48.85) | 630 (45.82) | 1418 (47.46) |
| Never smoker                            | 463 (28.7)  | 412 (29.96) | 875 (29.28)  |
| Total                                   | 1613 (100)  | 1375 (100)  | 2988 (100)   |
| P-value chi-squared test                |             |             | 0.24         |

|                                                                 |              |               |               |
|-----------------------------------------------------------------|--------------|---------------|---------------|
| <b>Physical activity in last 4 weeks (age 53)</b>               |              |               |               |
| None                                                            | 807 (50.06)  | 670 (48.76)   | 1477 (49.46)  |
| 1-4 times                                                       | 265 (16.44)  | 253 (18.41)   | 518 (17.35)   |
| 5 or more times                                                 | 540 (33.5)   | 451 (32.82)   | 991 (33.19)   |
| Total                                                           | 1612 (100)   | 1374 (100)    | 2986 (100)    |
| P-value chi-squared test                                        |              |               | 0.36          |
|                                                                 | Mean (N)     | Mean (N)      | Mean (N)      |
| <b>Body mass index (age 53)</b>                                 | 27.49 (1578) | 27.35 (1370)  | 27.43 (2948)  |
| P-value t-test                                                  |              |               | 0.41          |
| <b>Forced expiratory volume - 1 second<sup>a</sup> (age 53)</b> | 2.8 (1533)   | 2.76 (1326)   | 2.78 (2859)   |
| P-value t-test                                                  |              |               | 0.17          |
| <b>Grip strength (age 53)</b>                                   | 37.55 (1527) | 37.59 (1323)  | 37.57 (2850)  |
| P-value t-test                                                  |              |               | 0.94          |
| <b>Diastolic blood pressure (age 53)</b>                        | 84.32 (1573) | 84.57 (1354)  | 84.44 (2927)  |
| P-value t-test                                                  |              |               | 0.58          |
| <b>Systolic blood pressure (age 53)</b>                         | 136 (1573)   | 136.17 (1354) | 136.08 (2927) |
| P-value t-test                                                  |              |               | 0.41          |

AA age acceleration

<sup>a</sup> Forced expiratory volume is an indicator of lung function

**Table S20**

Logistic regression of the association of SEP and health indicators and DNAm AA data availability<sup>a</sup> in the age 53 sample

| Variable                                                         | OR (95% CI)       | N    |
|------------------------------------------------------------------|-------------------|------|
| <b>Sex</b>                                                       |                   |      |
| Male                                                             | Reference         |      |
| Female                                                           | 1.06 (0.92, 1.23) | 3035 |
| <b>Childhood social class (age 4)</b>                            |                   |      |
| Professional                                                     | Reference         |      |
| Intermediate                                                     | 1.06 (0.75, 1.51) |      |
| Skilled non-manual                                               | 0.97 (0.69, 1.38) |      |
| Skilled manual                                                   | 1.14 (0.81, 1.59) |      |
| Partly Skilled                                                   | 1.09 (0.77, 1.54) |      |
| Unskilled                                                        | 0.80 (0.52, 1.23) | 2783 |
| <b>Adult social class (age 53)</b>                               |                   |      |
| Professional                                                     | Reference         |      |
| Intermediate                                                     | 1.15 (0.85, 1.55) |      |
| Skilled non-manual                                               | 1.28 (0.93, 1.76) |      |
| Skilled manual                                                   | 1.01 (0.73, 1.40) |      |
| Partly Skilled                                                   | 1.41 (0.99, 2.01) |      |
| Unskilled                                                        | 1.51 (0.95, 2.40) | 2776 |
| <b>Education attainment (age 26)</b>                             |                   |      |
| Higher education                                                 | Reference         |      |
| School post16                                                    | 1.03 (0.78, 1.35) |      |
| Vocational/school to 16                                          | 1.10 (0.84, 1.45) |      |
| No quals                                                         | 0.95 (0.73, 1.23) | 2866 |
| <b>Household income £/year (age 53)</b>                          |                   |      |
| £45 000 or more                                                  | Reference         |      |
| £35,000 - £44,999                                                | 1.13 (0.81, 1.57) |      |
| £30,000 - £34,999                                                | 1.40 (1.03, 1.90) |      |
| £25,000 - £29,999                                                | 1.62 (1.15, 2.29) |      |
| £20,000 - £24,999                                                | 1.57 (1.17, 2.11) |      |
| £15,000 - £19,999                                                | 1.27 (0.94, 1.71) |      |
| £10,000 - £14,999                                                | 1.48 (1.10, 1.99) |      |
| Less than £10,000                                                | 1.19 (0.88, 1.61) | 2831 |
| <b>Smoking history up to age 53</b>                              |                   |      |
| Current smoker                                                   | Reference         |      |
| Ex-smoker                                                        | 0.87 (0.72, 1.04) |      |
| Never                                                            | 0.97 (0.79, 1.18) | 2988 |
| <b>Physical activity in last 4 weeks (age 53)</b>                |                   |      |
| None                                                             | Reference         |      |
| 1-4 times a week                                                 | 1.15 (0.94, 1.41) |      |
| 5 or more times                                                  | 1.01 (0.86, 1.18) | 2986 |
| <b>Body mass index in kg/(m<sup>2</sup>) (age 53)</b>            |                   |      |
| Mean                                                             | 0.99 (0.98, 1.01) | 2948 |
| <b>Forced expiratory volume in 1 second<sup>b</sup> (age 53)</b> |                   |      |
| Mean                                                             | 0.93 (0.84, 1.03) | 2859 |
| <b>Grip strength (age 53)</b>                                    |                   |      |
| Mean                                                             | 1.00 (1.00, 1.01) | 2850 |
| <b>Diastolic blood pressure (age 53)</b>                         |                   |      |

---

|                                         |                   |      |
|-----------------------------------------|-------------------|------|
| Mean                                    | 1.00 (1.00, 1.01) | 2927 |
| <hr/>                                   |                   |      |
| <b>Systolic blood pressure (age 53)</b> |                   |      |
| Mean                                    | 1.00 (1.00, 1.00) | 2927 |

---

<sup>a</sup> DNAm data availability: 0 DNAm data not collected, 1 DNAm data available

<sup>b</sup> Forced expiratory volume is an indicator of lung function
